# Supplementary material for: Sawdust-Derived Activated Carbon with Hierarchical Pores for High-Performance Symmetric Supercapacitors
Source: MDPI journal article supplement (doi:10.3390/nano12050810), 2022-02-28
Supplement: s1 [file s1]

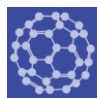

## Supplementary Materials

# Sawdust-Derived Activated Carbon with Hierarchical Pores for High-Performance Symmetric Supercapacitors

Yan Zhou <sup>1,†</sup>, Jun Li <sup>2,†</sup>, Shilin Hu <sup>1</sup>, Gujie Qian <sup>3</sup>, Juanjuan Shi <sup>1</sup>, Shengyun Zhao <sup>1</sup>, Yulin Wang <sup>1</sup>, Chuan Wang <sup>4,\*</sup> and Jiabiao Lian <sup>2,\*</sup>

<sup>1</sup> School of Ecology and Resource Engineering, School of Civil Engineering and Architecture, Wuyi University, Wuyishan 354300, China; zhouyan@wuyiu.edu.cn (Y.Z.); hslwyu2021@163.com (S.H.); sjj1998wyu@163.com (J.S.); zhaoshengyun@wuyiu.edu.cn (S.Z.); ylwanghm@163.com (Y.W.);

<sup>2</sup> Key Laboratory of Zhenjiang, Institute for Energy Research, Jiangsu University, Zhenjiang 212013, China; lj42485115@163.com

<sup>3</sup> College of Science and Engineering, Flinders University, Bedford Park, SA 5042, Australia; gujie.qian@flinders.edu.au

<sup>4</sup> Institute of Advanced Synthesis, Jiangsu National Synergetic Innovation Center for Advanced Materials, School of Chemistry and Molecular Engineering, Nanjing Tech University, 30 Puzhu South Road, Nanjing 211800, China

† These authors contributed equally to this work.

\* Correspondence: ias\_cwang@njtech.edu.cn (C.W.); jblian@ujs.edu.cn (J.L.)

## Supplementary Materials:

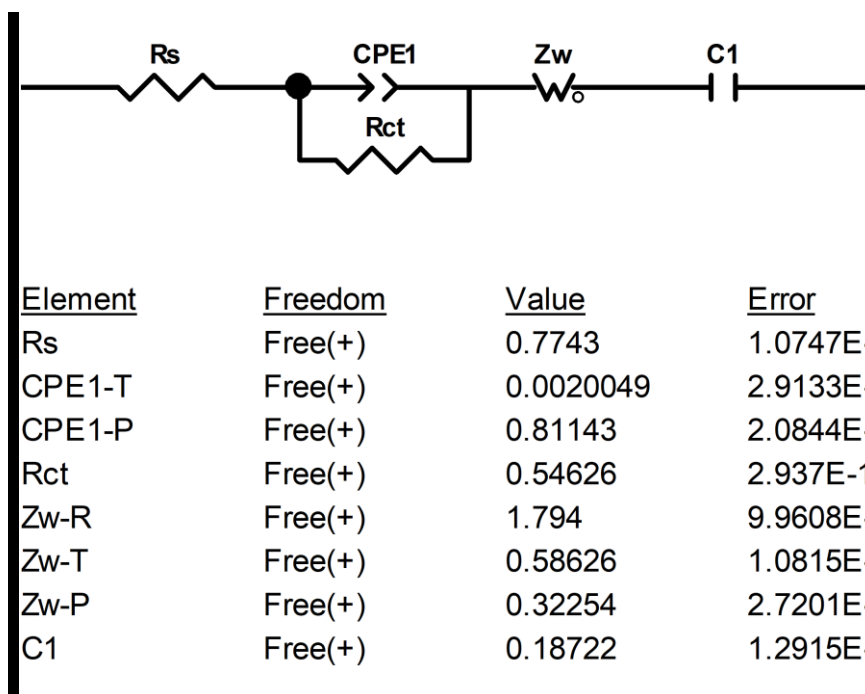

**Figure S1.** The equivalent electrical circuit model used for fitting the Nyquist plot and the values derived from the fitted data.

**Table S1.** Electrochemical performance comparison of biomass-derived carbon materials.

| Reference                    | Precursor                  | Electrolyte                         | Specific Capacitance (F g <sup>-1</sup> )                     | Cycling performance                              |
|------------------------------|----------------------------|-------------------------------------|---------------------------------------------------------------|--------------------------------------------------|
| [1]                          | Rice straw                 | 1M H <sub>2</sub> SO <sub>4</sub>   | 332@0.5A g <sup>-1</sup>                                      | 99% over 5000 cycles @10A g <sup>-1</sup>        |
| [2]                          | Pine cone                  | 1M NaSO <sub>4</sub>                | 137@0.5A g <sup>-1</sup>                                      | 100% over 10,000 cycles@5.0A g <sup>-1</sup>     |
| [3]                          | Pomelo peel                | 1M NaNO <sub>3</sub>                | 43.5@1.0A g <sup>-1</sup>                                     | 90% over 1100 cycles@2.0A g <sup>-1</sup>        |
| [4]                          | Lotus leaf                 | 6 M KOH                             | 298@20A g <sup>-1</sup>                                       | 90% over 5000 cycles                             |
| [5]                          | Pitch                      | 6 M KOH                             | 157@100A g <sup>-1</sup>                                      | -                                                |
| [6]                          | Macadamia<br>Nut Shell     | 1 M Na <sub>2</sub> SO <sub>4</sub> | 231@1.0A g <sup>-1</sup>                                      | 87% over 1000 cycles@10A g <sup>-1</sup>         |
| [7]                          | Coconut shells             | K <sub>2</sub> CO <sub>3</sub>      | 91.2@0.2A g <sup>-1</sup>                                     | 85% over 5000 cycles@0.1A g <sup>-1</sup>        |
| [8]                          | Cotton stalk               | 1 M KOH                             | 254@0.2A g <sup>-1</sup>                                      | 96% over 10,000 cycles@1.0A g <sup>-1</sup>      |
| [9]                          | Rose                       | 6 M KOH                             | 208@0.5A g <sup>-1</sup>                                      | 99% over 25,000 cycles@10A g <sup>-1</sup>       |
| [10]                         | Rice husk                  | 6 M KOH                             | 110.2@0.2A g <sup>-1</sup>                                    | 78% over 5000 cycles@0.5 A g <sup>-1</sup>       |
| [11]                         | Mulberry wood              | 2 M KOH                             | 96@5.0 mA cm <sup>-1</sup>                                    | 87% over 5000 cycles@5.0 mA cm <sup>-1</sup>     |
| [12]                         | Bagasse                    | 6 M KOH                             | 320@0.5A g <sup>-1</sup>                                      | 93% over 15,000 cycles@10A g <sup>-1</sup>       |
| <b>This work<br/>(SD-AC)</b> | <b>Chinese fir sawdust</b> | <b>3 M KOH</b>                      | <b>244.1@1.0A g<sup>-1</sup><br/>129.1@20A g<sup>-1</sup></b> | <b>87% over 10,000 cycles@10A g<sup>-1</sup></b> |

**Table S2.** Electrochemical performance of our SD-AC//SD-AC symmetric supercapacitor in comparison with other previously reported supercapacitors.

| Reference        | Source of Electrode<br>Materials | Energy Density<br>(Wh kg <sup>-1</sup> ) | Power Density<br>(W kg <sup>-1</sup> ) | Cycling performance                               |
|------------------|----------------------------------|------------------------------------------|----------------------------------------|---------------------------------------------------|
| [1]              | Rice straw                       | 17.4                                     | 174                                    | 78% over 5000 cycles@0.5A g <sup>-1</sup>         |
| [2]              | Pine cone                        | 19.0                                     | 100                                    | 100% over 10,000 cycles@5A g <sup>-1</sup>        |
| [3]              | Pomelo peel                      | 17.1                                     | 420                                    | -                                                 |
| [4]              | Lotus leaf                       | 9.2                                      | 491                                    | 90% over 5000 cycles@5A g <sup>-1</sup>           |
| [5]              | Pitch                            | 20                                       | 100                                    | -                                                 |
| [7]              | Coconut shells                   | 23.1                                     | 135                                    | 89.2% over 5000 cycles@2A g <sup>-1</sup>         |
| [8]              | Cotton stalk                     | 18.1                                     | 450                                    | -                                                 |
| [9]              | Rose                             | 20.3                                     | 525                                    | 92% over 10,000 cycles@5A g <sup>-1</sup>         |
| [12]             | Bagasse                          | 20                                       | 182                                    | 91% over 10,000 cycles                            |
| [13]             | Soya Bean pods                   | 22.3                                     | 450                                    | 91% over 10,000 cycles@5A g <sup>-1</sup>         |
| <b>This work</b> | <b>Chinese fir sawdust</b>       | <b>19.9</b>                              | <b>650</b>                             | <b>80% over 10,000 cycles @10A g<sup>-1</sup></b> |

## References

1. Sudhan, N.; Subramani, K.; Karnan, M.; Ilayaraja, N.; Sathish, M. Biomass-derived activated porous carbon from rice straw for a high-energy symmetric supercapacitor in aqueous and non-aqueous electrolytes. *Energy Fuels*. **2016**, *31*, 977–985.
2. Bello, A.; Manyala, N.; Barzegar, F.; Khaleed, A.A.; Momodu, D.Y.; Dangbegnon, J.K. Renewable pine cone biomass derived carbon materials for supercapacitor application. *RSC Adv.* **2016**, *6*, 1800–1809.
3. Peng, C.; Lang, J.; Xu, S.; Wang, X. Oxygen-enriched activated carbons from pomelo peel in high energy density supercapacitors. *RSC Adv.* **2014**, *4*, 54662–54667.
4. Qu, S.; Wan, J.; Dai, C.; Jin, T.; Ma, F. Promising as high-performance supercapacitor electrode materials porous carbons derived from biological lotus leaf. *J. Alloys Compd.* **2018**, *751*, 107–116.
5. Guo, Y.; Shi, Z.; Chen, M.; Wang, C. Hierarchical porous carbon derived from sulfonated pitch for electrical double layer capacitors. *J. Power Sources*. **2014**, *252*, 235–243.
6. Yan, X.; Jia, Y.; Zhuang, L.; Zhang, L.; Wang, K.; Yao, X. Defective carbons derived from macadamia nut shell biomass for efficient oxygen reduction and supercapacitors. *ChemElectroChem*. **2018**, *5*, 1874–1879.
7. Xia, J.; Zhang, N.; Chong, S.; Chen, Y.; Sun, C. Three-dimensional porous graphene-like sheets synthesized from biocarbon via low-temperature graphitization for a supercapacitor. *Green Chem.* **2018**, *20*, 694–700.
8. Tian, X.; Ma, H.; Li, Z.; Yan, S.; Ma, L.; Yu, F.; Wang, G.; Guo, X.; Ma, Y.; Wong, C. Flute type micropores activated carbon from cotton stalk for high performance supercapacitors. *J. Power Sources*. **2017**, *359*, 88–96.
9. Zhao, C.; Huang, Y.; Zhao, C.; Shao, X.; Zhu, Z. Rose-derived 3D carbon nanosheets for high cyclability and extended voltage supercapacitors. *Electrochim. Acta*. **2018**, *291*, 287–296.
10. Zhang, W.; Lin, N.; Liu, D.; Xu, J.; Sha, J.; Yin, J.; Lin, H. Direct carbonization of rice husk to prepare porous carbon for supercapacitor applications. *Energy*. **2017**, *128*, 618–625.
11. Ma, Y.; Yin, J.W.; Liang, H.Q.; Yao, D.X.; Xia, Y.F.; Zuo, K.H.; Zeng, Y.P. A two step approach for making super capacitors from waste wood. *J. Cleaner. Prod.* **2021**, *279*, 123–786.
12. Feng, H.; Hu, H.; Dong, H.; Xiao, Y.; Cai, Y.; Lei, B.; Zheng, M. Hierarchical structured carbon derived from bagasse wastes: A simple and efficient synthesis route and its improved electrochemical properties for high-performance supercapacitors. *J. Power Sources*. **2016**, *302*, 164–173.
13. Liu, Z.; Zhu, Z.; Dai, J.; Yan, Y. Waste biomass based-activated carbons derived from soybean Pods as electrode materials for high-performance supercapacitors. *ChemistrySelect*. **2018**, *3*, 5726–5732.
